# Supplementary material
Source: publisher figshare collection journal article supplement (https://sage.figshare.com/ndownloader/files/13569569)
Supplement: Supplementary file 1 [file 13569569]

## Predictive Validity of Thin-Slice Nonverbal Behavior from Social Interactions

### Methods Reporting

This paper involves secondary analyses of data collected from five separate research studies. The original research studies (listed below) contain detailed information on original data collection procedures. As the findings presented in this paper are secondary in nature, verbatim wording of all independent and dependent variable instructions, manipulations, and measures are not relevant.

#### Study 1

Murphy, N. A., Hall, J. A., & Schmid Mast, M. (2016). Nonverbal self-accuracy: Individual differences in knowing one's own social interaction behavior. *Personality and Individual Differences, 101*, 30-34. doi: <http://dx.doi.org/10.1016/j.paid.2016.05.023>

#### Study 2

Schmid Mast, M., & Hall, J. A. (2006). Women's advantage at remembering others' appearance: A systematic look at the why and when of a gender difference. *Personality and Social Psychology Bulletin, 32*, 353-364. doi:10.1177/0146167205282150

#### Study 3

Frauendorfer, D., Schmid Mast, M., Nguyen, L. S., & Gatica-Perez, D. (2014). Nonverbal social sensing in action: Unobtrusive recording and extracting of nonverbal behavior in social interactions illustrated with a research example. *Journal of Nonverbal Behavior, 38*, 231-245. doi:10.1007/s10919-014-0173-5

#### Study 4

Ruben, M. A., Hall, J. A., & Schmid Mast, M. (2015). Smiling in a job interview: When less is more. *Journal of Social Psychology, 155*, 107-126.

Study 5

Johnson, K. E. (2015). Individual differences in conflict management: An assessment of the Big Five, empathy, perspective taking, and interpersonal accuracy in conflict management (Unpublished master's thesis). Northeastern University, Boston, MA.
